# Supplementary material for: Overexpression of the protein phosphatase 2A regulatory subunit a gene ZmPP2AA1 improves low phosphate tolerance by remodeling the root system architecture of maize
Source: PubMed Central journal article supplement (PMC5407761; doi:10.1371/journal.pone.0176538), 2017-04-27
Supplement: pone.0176538.s001.pdf [file pone.0176538.s001.pdf]

**S1 Table. PCR primers for *ZmPP2AA1* cloning and molecular characterization of *ZmPP2AA1* transgenic maize.**

| Primer                 | Sequence                          |
|------------------------|-----------------------------------|
| <i>ZmPP2AA1</i> ORF-F  | CTGATGGCTATGATTGATG               |
| <i>ZmPP2AA1</i> ORF-R  | CAAAGGCTAGTTAGCTTGA               |
| <i>ZmPP2AA1</i> OE-F   | TTAGGATCCATGGCTATGATTGATG         |
| <i>ZmPP2AA1</i> OE-R   | AAAGGATCCTTAGCTTGACACCATC         |
| <i>ZmPP2AA1</i> RNAi-F | CAACCCGGGACTAGTTGTGAGGCTGTTGGCCCT |
| <i>ZmPP2AA1</i> RNAi-R | CTCGGATCCGAGCTCAATTGCTGGTAGCAGTGA |
| <i>ZmPP2AA1</i> PCR-F  | GCGTATCGTCCTGTGGTC                |
| <i>ZmPP2AA1</i> PCR-R  | CAGGAGCCATTCCCATAA                |
| <i>bar</i> PCR-F       | ATGAGCCCAGAACGACGCC               |
| <i>bar</i> PCR-R       | TCAAATCTCGGTGACGGGC               |
| <i>ZmPP2AA1</i> qRT-F  | GGCTGTGCTGCCCTTGTA                |
| <i>ZmPP2AA1</i> qRT-R  | CCTATCCGCACTTCAGCCTC              |
| <i>actin</i> qRT-F     | ATCACCATTGGGTCAGAAAGG             |
| <i>actin</i> qRT-R     | GTGCTGAGAGAAGCCAAAATAGAG          |

*ZmPP2AA1* ORF primers were used for full ORF amplification of *ZmPP2AA1* ORF; *ZmPP2AA1* OE and *ZmPP2AA1* RNAi primers were used for overexpression and RNAi vectors construction, respectively; *ZmPP2AA1* PCR and *bar* PCR primers were used for *ZmPP2AA1* and *bar* detection in transgenic plants, respectively; *ZmPP2AA1* qRT and *actin* qRT primers were used for qRT-PCR for *ZmPP2AA1* and *actin*, respectively.
