# Supplementary material for: Overexpression of the protein phosphatase 2A regulatory subunit a gene ZmPP2AA1 improves low phosphate tolerance by remodeling the root system architecture of maize
Source: PubMed Central journal article supplement (PMC5407761; doi:10.1371/journal.pone.0176538), 2017-04-27
Supplement: pone.0176538.s002.pdf [file pone.0176538.s002.pdf]

**S2 Table. Overexpression of *ZmPP2AA1* causes PR curling in maize.**

| Conditions | No. of seedlings exhibiting curling root |               |               |              |              |
|------------|------------------------------------------|---------------|---------------|--------------|--------------|
|            | WT                                       | OE-4          | OE-11         | RNAi-20      | RNAi-22      |
| SP         | 1.20 ± 0.84 b                            | 17.8 ± 0.84 a | 17.8 ± 0.84 a | 0.8 ± 0.84 b | 0.6 ± 0.55 b |
| LP         | 0.8 ± 0.84 b                             | 18 ± 0.71 a   | 17.4 ± 0.55 a | 0.6 ± 0.55 b | 0.8 ± 0.84 b |

WT and transgenic seedlings were grown under SP or LP conditions for 6 days.

Seedlings exhibiting root curling were counted. Values are the means ± SD

(n=20). The experiment was repeated five times.
