# Supplementary material for: Overexpression of the protein phosphatase 2A regulatory subunit a gene ZmPP2AA1 improves low phosphate tolerance by remodeling the root system architecture of maize
Source: PubMed Central journal article supplement (PMC5407761; doi:10.1371/journal.pone.0176538), 2017-04-27
Supplement: pone.0176538.s004.pdf [file pone.0176538.s004.pdf]

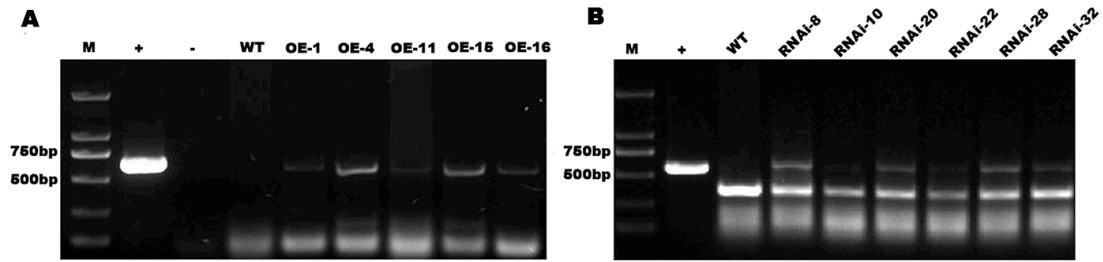

**S2 Figure. PCR analysis of transgenic plants. (A)** PCR analysis of the *ZmPP2AA1* overexpressing T<sub>3</sub> transgenic plants. M, DNA marker DL2,000; +, the PCR product of plasmid pCAM-BIA3300-PUbi::*ZmPP2AA1*-Tnos-P35S::*bar*; -, the PCR product of H<sub>2</sub>O as a negative control template; WT, untransformed control Qi-319; OE-1, OE-4, OE-11, OE-15, OE-16, different *ZmPP2AA1* overexpressing transgenic lines. **(B)** PCR analysis of *ZmPP2AA1* RNAi T<sub>3</sub> transgenic plants for the *bar* gene. M, DNA marker DL2,000; +, the PCR product of plasmid pCAM-BIA3300-PUbi::*zmpp2aal*-Tnos-P35S::*bar* as a positive control; WT, untransformed control Qi-319; RNAi-8, RNAi-10, RNAi-20, RNAi-22, RNAi-28, RNAi-32, different *ZmPP2AA1* RNAi transgenic lines.
