# Supplementary material for: Overexpression of the protein phosphatase 2A regulatory subunit a gene ZmPP2AA1 improves low phosphate tolerance by remodeling the root system architecture of maize
Source: PubMed Central journal article supplement (PMC5407761; doi:10.1371/journal.pone.0176538), 2017-04-27
Supplement: pone.0176538.s005.pdf [file pone.0176538.s005.pdf]

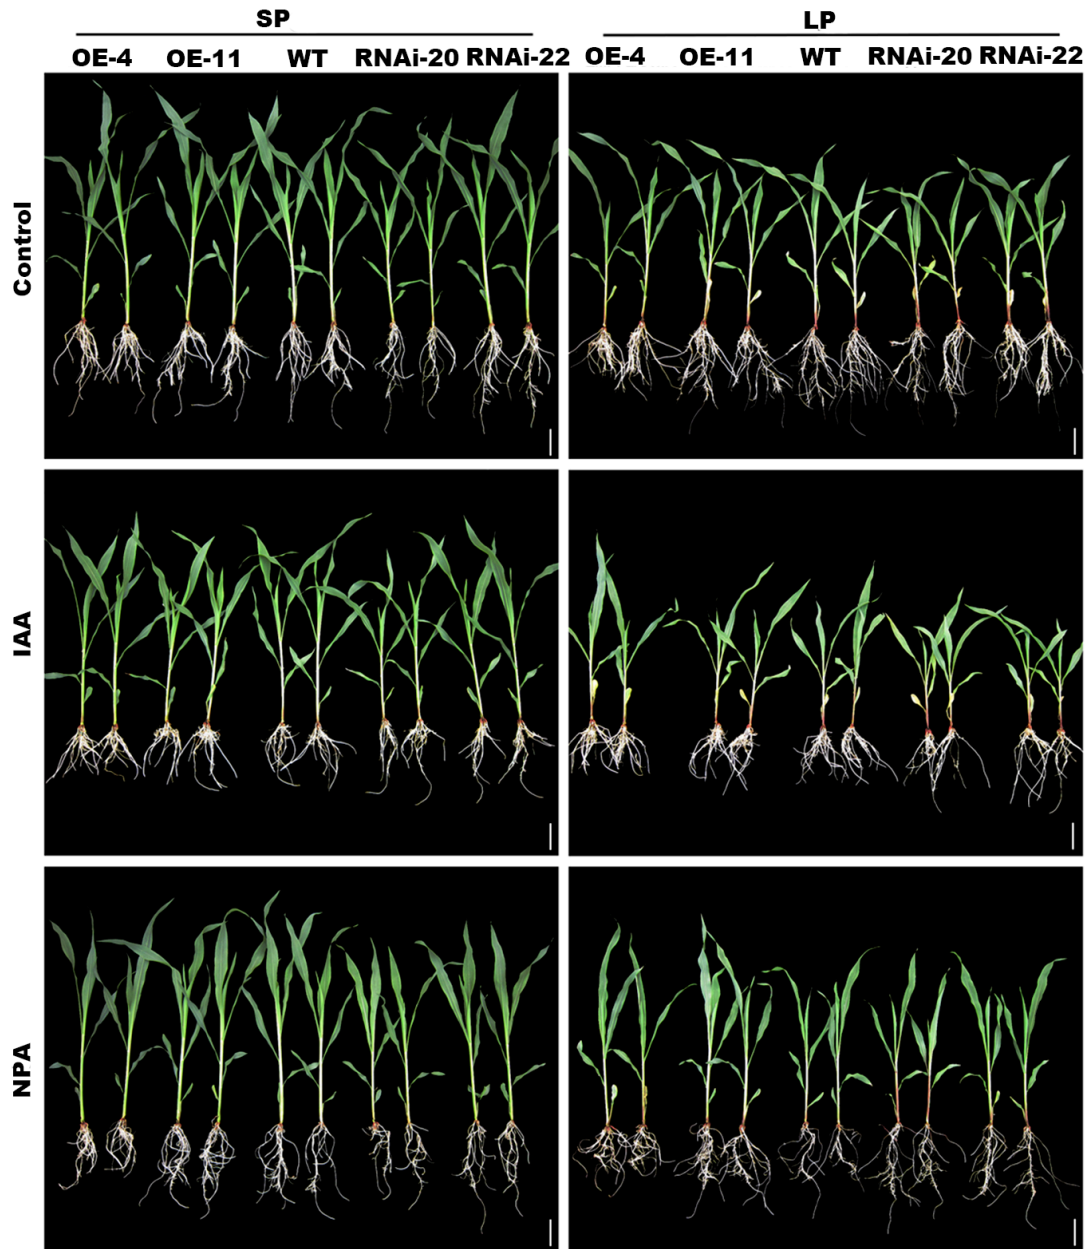

**S3 Figure. Representative seedlings grown for 15d under SP (left) or LP (right) solution with or without IAA or NPA. Bar=5 cm.**
